# Supplementary material
Source: MDPI journal article supplement (https://www.mdpi.com/2227-7102/13/10/1057)
Supplement: s1 [file s1 › education-2576262-supplementary.pdf]

**Supplementary material Table S1:** Methods of summative assessment of clinical training during postgraduate internal medicine specialization.

| Country                  | College                                            | Accrediting body                                              | Summative Assessment Name                                                                                                                                     | Clinical Performance assessments                                                                                              |
|--------------------------|----------------------------------------------------|---------------------------------------------------------------|---------------------------------------------------------------------------------------------------------------------------------------------------------------|-------------------------------------------------------------------------------------------------------------------------------|
| Australia<br>New Zealand | Royal Australasian College of Physicians           | Australian Medical Council and Medical Council of New Zealand | Divisional Clinical Examination                                                                                                                               | Two traditional Long Cases and four traditional Short Cases. Total four hours examination (two hours observed).               |
| United Kingdom           | Joint Royal Colleges of Physicians Training Board  | General Medical Council                                       | Membership of the Royal Colleges of Physicians (UK): Practical Assessment of Clinical Examination Skills                                                      | Five twenty-minute duration OCSE stations (total of eight clinical encounters). Total two hours of observed examination.      |
| USA                      | American Board of Internal Medicine                | American Council for Graduate Medical Education               | Variable per accredited medical school: achievement of core competency milestones using a variety of data sources: mini-CEx, OCSEs, ward-based feedback, etc. | Variable per accredited medical school: predominantly mini-CEx & OSCEs. No universal, formal assessment structure.            |
| Canada                   | Royal College of Physicians and Surgeons of Canada | Medical Council of Canada                                     | Royal College Applied Certification Examination<br>Medical Council of Canada Qualifying Examination (Part II)                                                 | Four 15-minute OSCE stations<br>Total one hour examination<br>Twelve 15-minute OSCE stations<br>Total three hours examination |
